# Supplementary material for: The role of private pesticide vendors in preventing access to pesticides for self-poisoning in rural Sri Lanka
Source: HighWire-hosted journal article supplement (doi:10.1136/injuryprev-2012-040748), 2013-06-04
Supplement: injuryprev-2012-040748supp_appendix.pdf [file injuryprev-2012-040748supp_appendix.pdf]

## **Appendix 1: Questionnaire Details**

### **First Interview**

#### 1. General characteristics of shop

- (i). Geographical location
- (ii). How old is the outlet (years)
- (iii). Shop observation

#### 2. Type of the outlet

- (i). Nature of the business
- (ii). Shop hours
- (iii). Pesticide sales
- (iv). Registration
- (v). If registered year
- (vi). Where pesticide obtained

#### 3. Respondent details?

- (i). Category
- (ii). Gender
- (iii). Experience of pesticide selling (years)

#### 4. Training participation

- (i). Did you participate any training related to pesticide selling before?
- (ii). Description of training

#### 5. About the customers

- (i). Coverage area
- (ii). Distance farmers travelling
- (iii). How farmers approach shop

- (iv). Your recommendations to farmers on pesticides
- (v). Farmer concerns on pesticides
- (vi). Farmer knowledge of colour coding
- (vii). Changes in trends of purchase impact of IPM

#### 6. Banning questions

- (i). Awareness of any bans
- (ii). Knowledge of bans
- (iii). Reasons for bans
- (iv). Substitute pesticides
- (v). Information to farmers
- (vi). Responses to farmers about bans
- (vii). Customer reactions
- (viii). Vendor reactions to bans

#### 7. Impact of banning

- (i). Views on bans for your business
- (ii). Other vendors reaction to bans
- (iii). Impact on farmers
- (iv). Community reaction to bans

#### 8. Possible Interventions to regulate pesticides

- (i). Government responses
- (ii). Phasing out

## Second Interview

### 1. About the suicide risk customers

- (i). Are you worried about selling pesticides to a people who may use it for suicide?
- (ii). Can you describe an experience where you had a high risk buyer trying to buy pesticides?

### 2. Identification of risk customers

- (i). Do you find it hard to recognize people with suicidal intent?
- (ii). Do you notice a difference between male and female desperate buyers?
- (iii). What are the methods/ tools that you use to distinguish high risk buyers?

### 3. Responses to risk customers

- (i). What was your immediate response once you recognized the high risk buyer in your shop?

### 4. Previous Experiences

- (i). Do you have any previous experience of selling pesticides to desperate buyers where they went on to use it for poisoning?
  - (a). If yes, please describe an example where this happened; "
  - (b). Was there any reaction in the community in this example?

### 5. Prevention

- (i). What support do you think is needed to help dealers recognize high risk buyers?
- (ii). Have you had any training to help recognize high risk buyers?
  - (a). If yes, was the training useful and why?
- (iii). What support do you think is needed to help suicidal people thinking about buying pesticides?

(iv).What do you think other in the government or companies could do to reduce poisoning?
